# Supplementary material for: A bitopic agonist bound to the dopamine 3 receptor reveals a selectivity site
Source: PubMed Central journal article supplement (PMC11377762; doi:10.1038/s41467-024-51993-4), 2024-09-05
Supplement: 41467_2024_51993_MOESM1_ESM.pdf [file 41467_2024_51993_MOESM1_ESM.pdf]

**Supplementary Information for:**  
**A bitopic agonist bound to the dopamine 3 receptor reveals a selectivity site**

Sandra Arroyo-Urea<sup>1,2</sup>, Antonina L. Nazarova<sup>3,4</sup>, Ángela Carrión-Antolí<sup>1,2</sup>, Alessandro Bonifazi<sup>5</sup>, Francisco O. Battiti<sup>5</sup>, Jordy Homing Lam<sup>3,4</sup>, Amy Hauck Newman<sup>5</sup>, Vsevolod Katritch<sup>3,4,6</sup> and Javier García-Nafría<sup>1\*</sup>

<sup>1</sup>Institute for Biocomputation and Physics of Complex Systems (BIFI), University of Zaragoza, 50018, Zaragoza, Spain

<sup>2</sup>Laboratory of Advanced Microscopy (LMA), University of Zaragoza, 50018, Zaragoza, Spain.

<sup>3</sup>Department of Quantitative and Computational Biology, University of Southern California, Los Angeles, CA 90089, USA

<sup>4</sup>Center for New Technologies in Drug Discovery and Development, Bridge Institute, Michelson Center for Convergent Biosciences, University of Southern California, Los Angeles, CA, USA.

<sup>5</sup>Medicinal Chemistry Section, Molecular Targets and Medications Discovery Branch, National Institute on Drug Abuse – Intramural Research Program, National Institutes of Health, 333 Cassell Drive, Baltimore, Maryland 21224, USA

<sup>6</sup>Department of Chemistry, University of Southern California, Los Angeles, CA, USA.

\* Corresponding author:

Javier García-Nafría

Email: [jgarcianafria@unizar.es](mailto:jgarcianafria@unizar.es)

**A**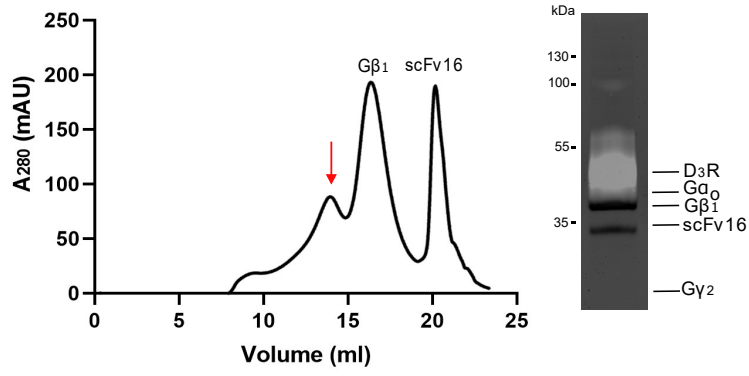**B**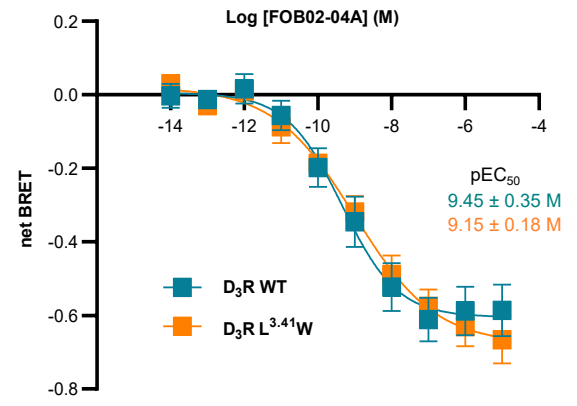

**Supplementary Figure 1. Purification of the D<sub>3</sub>R:G<sub>o</sub>:FOB02-04A complex and validation of the L<sup>3.41</sup>W mutation.** **A** Size exclusion chromatogram of the D<sub>3</sub>R:G<sub>o</sub>:FOB02-04A sample (left). SDS-PAGE of the pure D<sub>3</sub>R:G<sub>o</sub>:FOB02-04A sample with superposed in-gel fluorescence for the GFP-D<sub>3</sub>R (right). **B** Concentration-response curves of D<sub>3</sub>R WT (blue) compared to L<sup>3.41</sup>W variant (orange) upon G<sub>oA</sub> activation with FOB02-04A using the TRUPATH assay. Data are presented as means ± SEM of five (D<sub>3</sub>R WT) and six (L<sup>3.41</sup>W) independent experiments performed in technical triplicate. Source data are provided as a Source Data file.

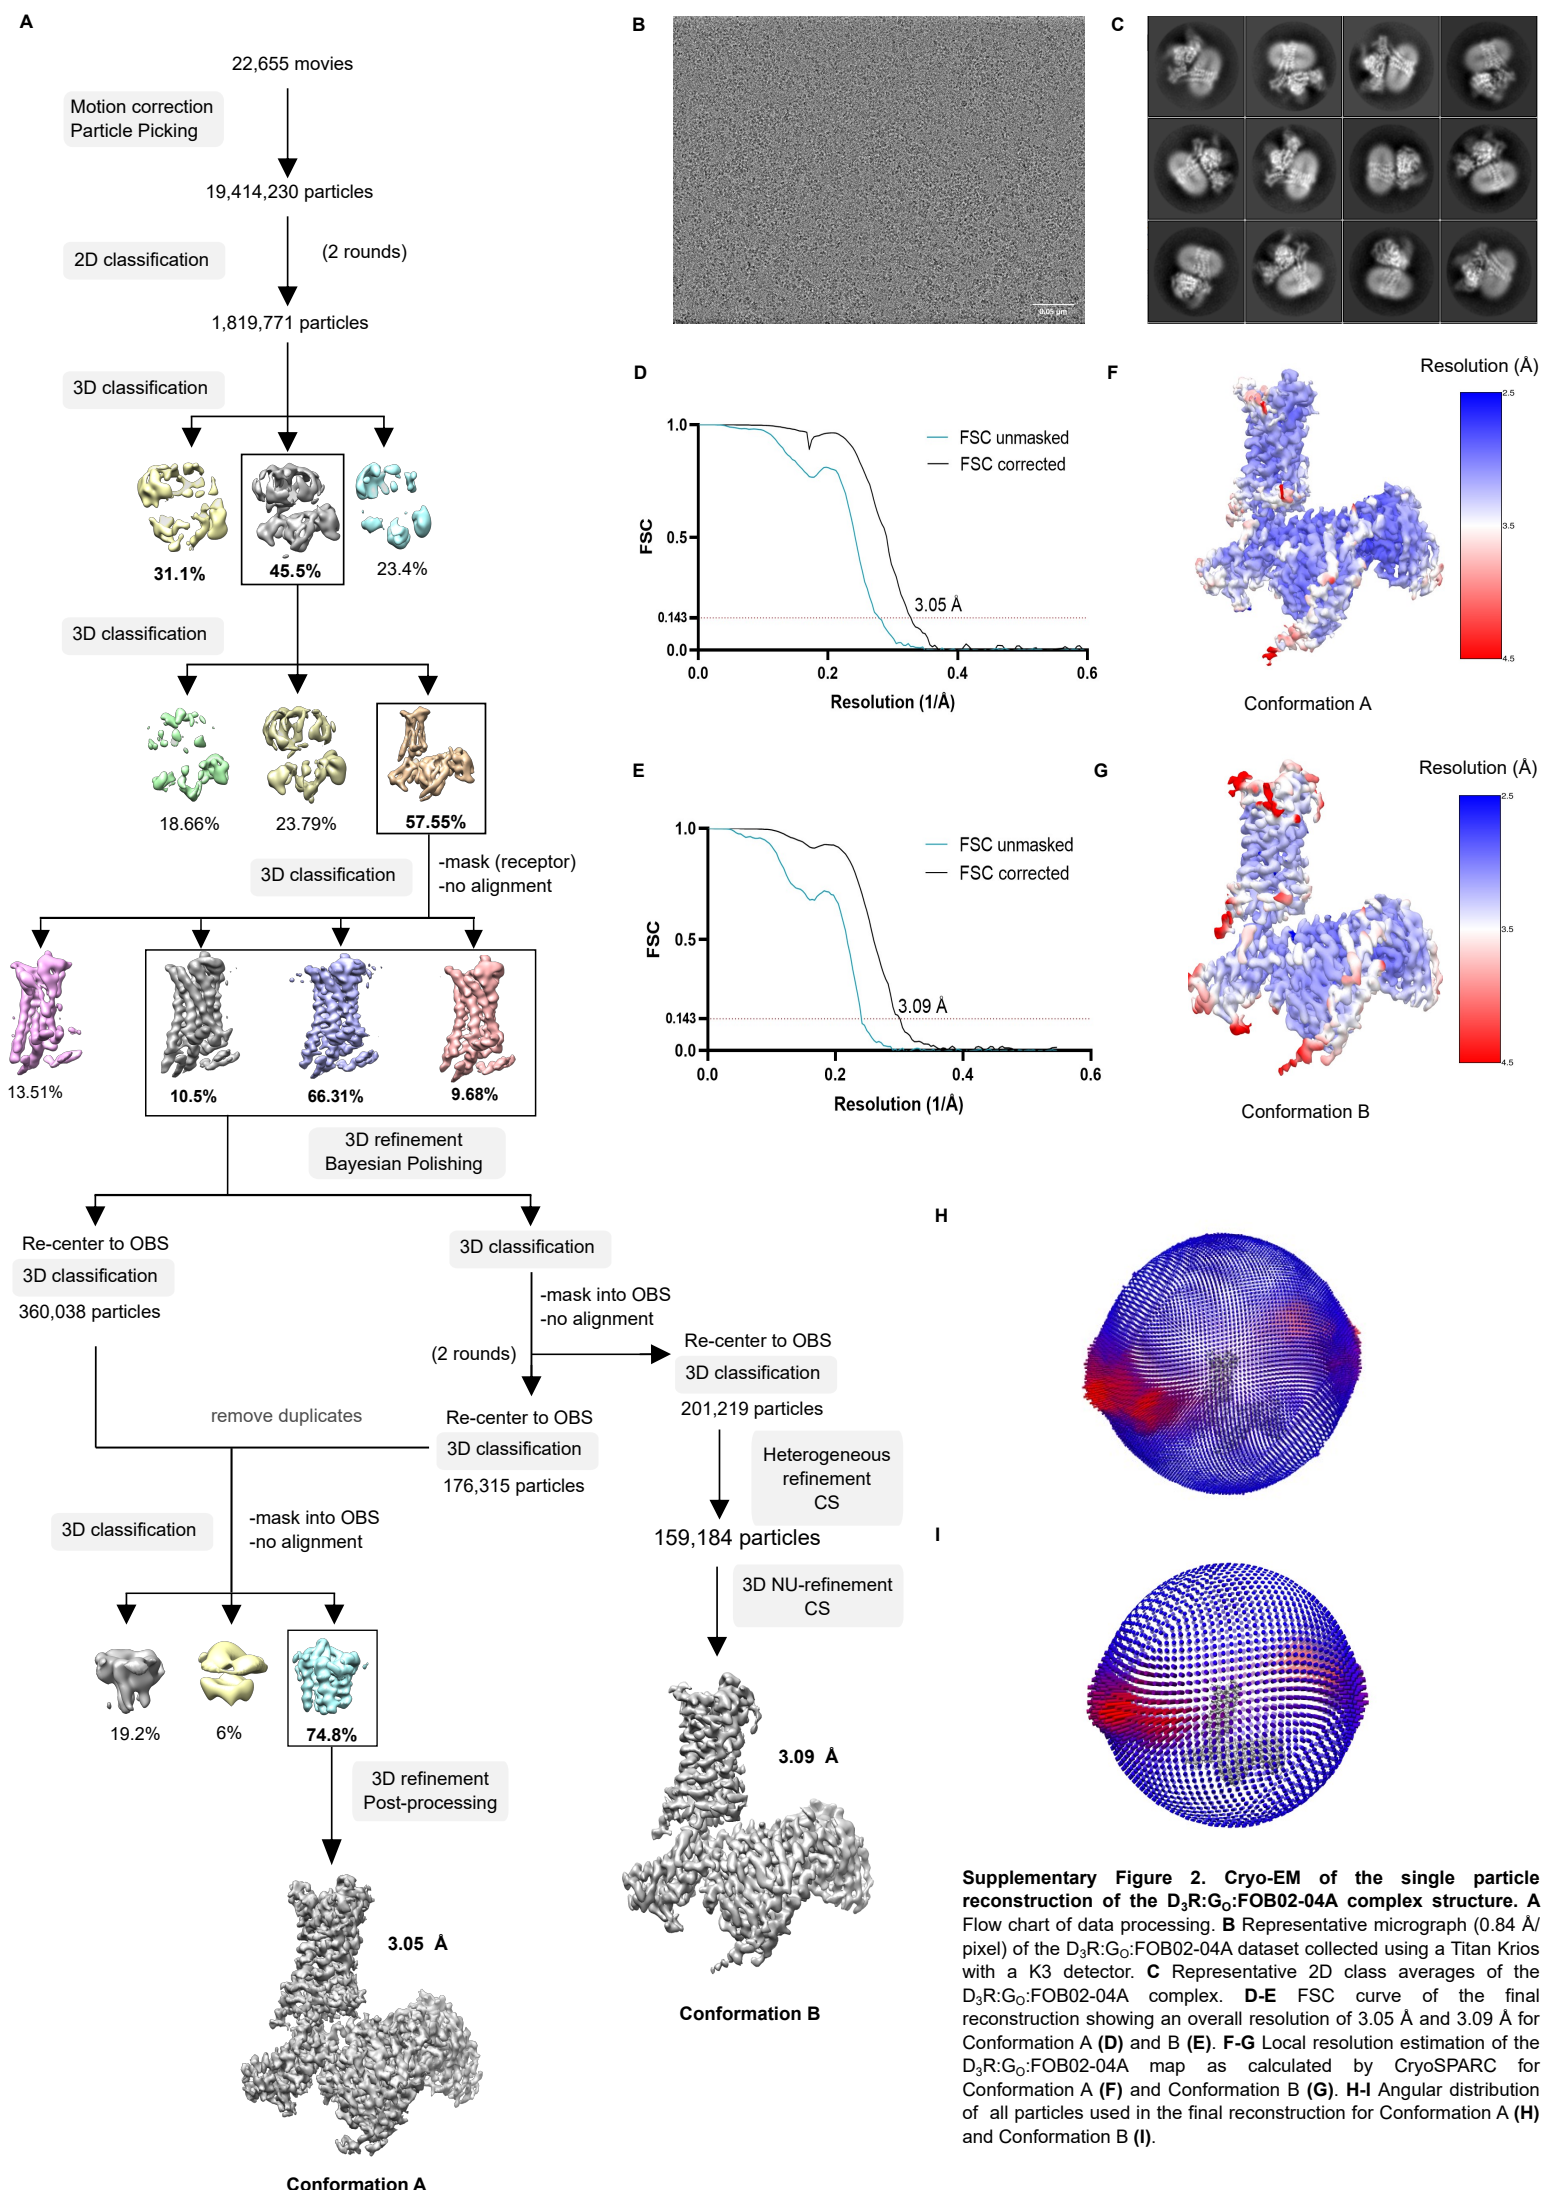

**Supplementary Figure 2. Cryo-EM of the single particle reconstruction of the  $D_3R:G_0:FOB02-04A$  complex. A** Flow chart of data processing. **B** Representative micrograph (0.84 Å/pixel) of the  $D_3R:G_0:FOB02-04A$  dataset collected using a Titan Krios with a K3 detector. **C** Representative 2D class averages of the  $D_3R:G_0:FOB02-04A$  complex. **D-E** FSC curve of the final reconstruction showing an overall resolution of 3.05 Å and 3.09 Å for Conformation A (**D**) and B (**E**). **F-G** Local resolution estimation of the  $D_3R:G_0:FOB02-04A$  map as calculated by CryoSPARC for Conformation A (**F**) and Conformation B (**G**). **H-I** Angular distribution of all particles used in the final reconstruction for Conformation A (**H**) and Conformation B (**I**).

**A**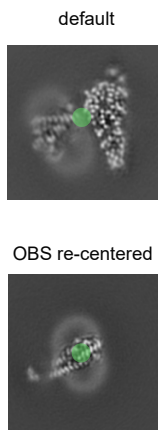**B**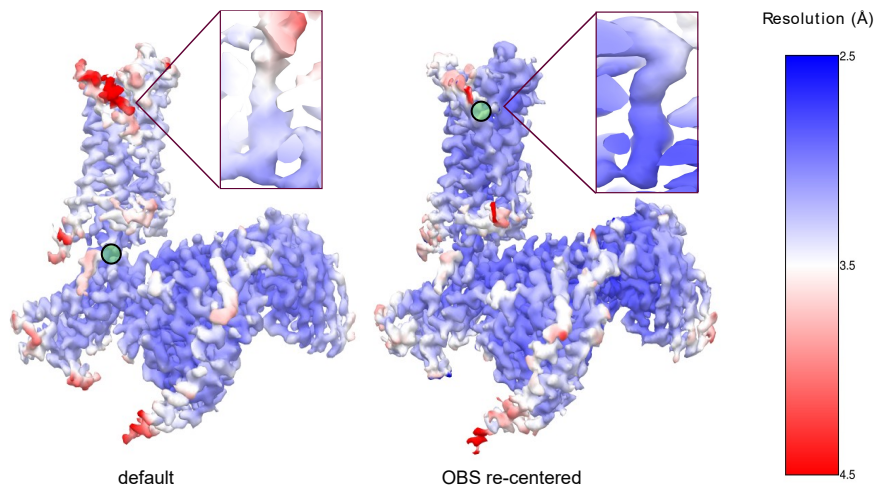

**Supplementary Figure 3. Effect of centering the ligand binding site on the cryo-EM box. A** Slices from 3D refinement before and after re-centering the particles at the OBS. **B** Local resolution of the cryo-EM maps (as calculated by CryoSPARC) with an inset into the ligand binding site before and after OBS re-centering. The center of the box is marked with a green dot in the 2D slices and 3D maps.

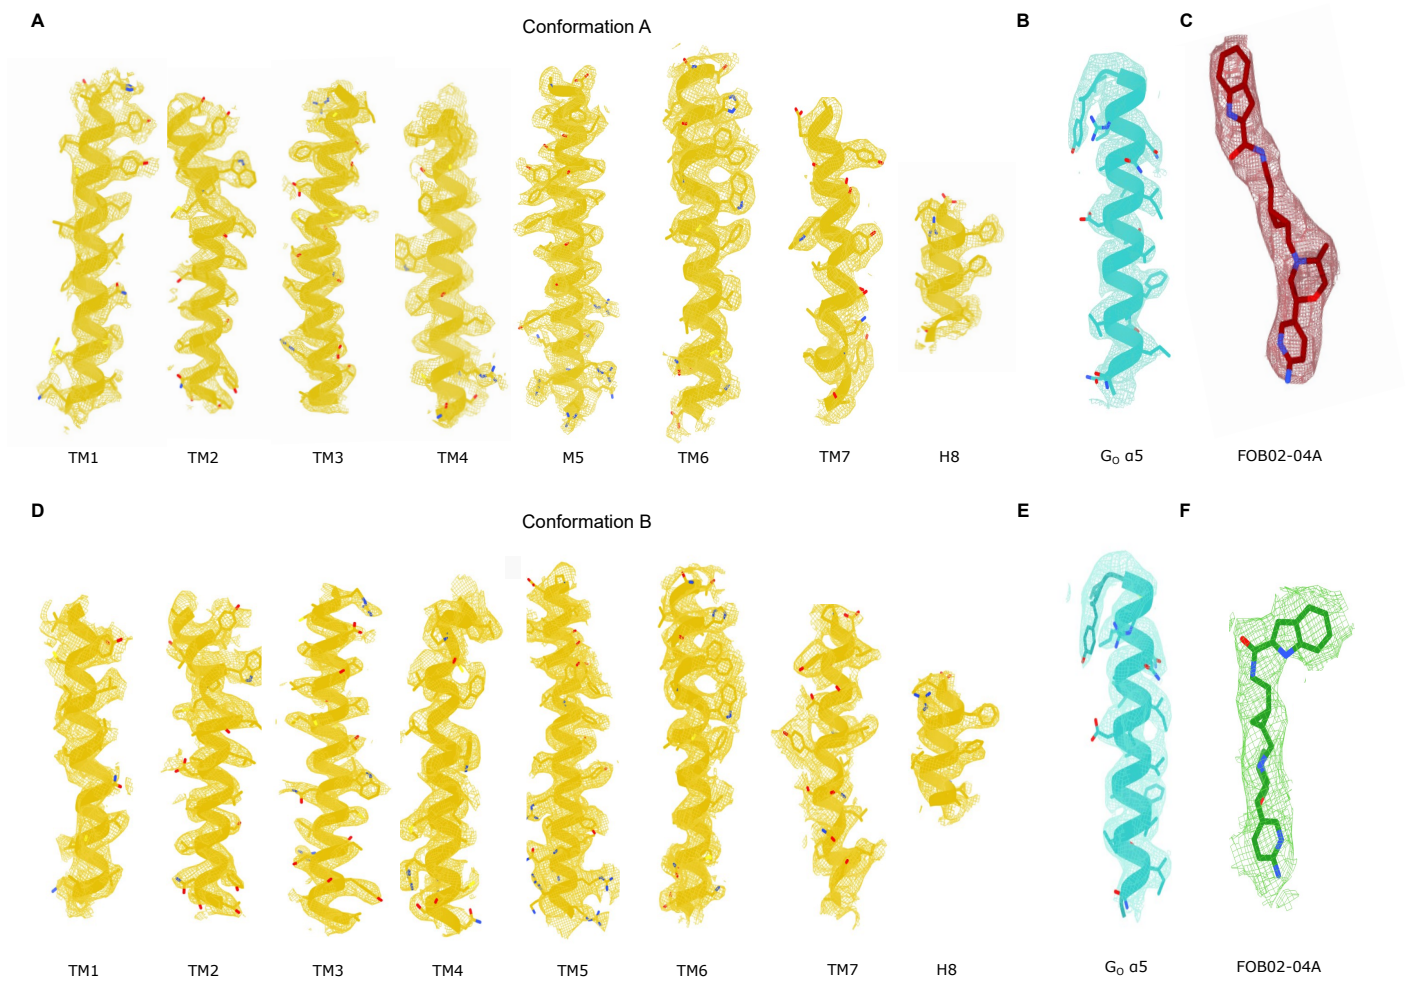

**Supplementary Figure 4. Cryo-EM map quality and model fit of the D<sub>3</sub>R:G<sub>o</sub>:FOB02-04A complexes.** Protein shown as cartoons with residues represented as sticks and colored by subunit (yellow D<sub>3</sub>R and cyan G<sub>o</sub>) or ligand (dark red for Conformation A and green for Conformation B). Cryo-EM density is shown as mesh with color corresponding to each component. **A-C** Transmembrane helices of D<sub>3</sub>R Conformation A, the α5-helix of G<sub>o</sub> and FOB02-04A in Conformation A. **D-F** Transmembrane helices of D<sub>3</sub>R Conformation B, the α5-helix of G<sub>o</sub> and FOB02-04A in Conformation B.

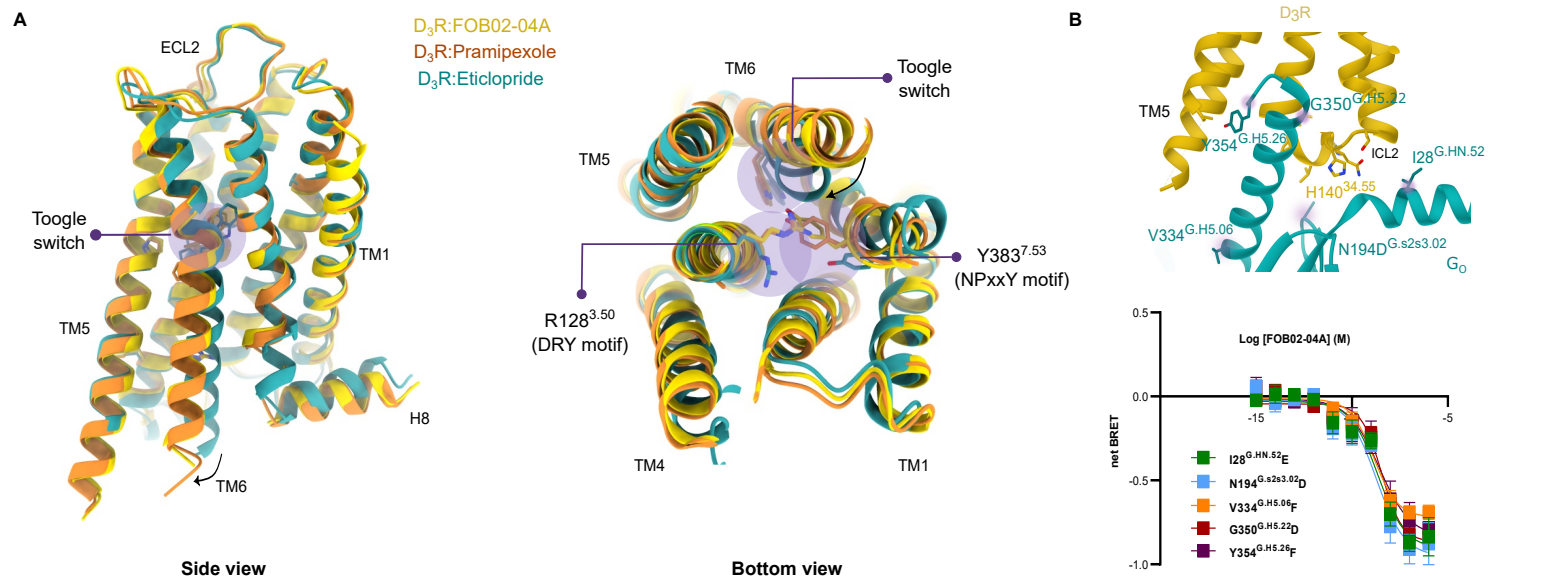

**Supplementary Figure 5. Activation of the D<sub>3</sub>R by FOB02-04A.** **A** Two orthogonal views of the D<sub>3</sub>R-FOB02-04A (yellow, cartoons) superposed to the inactive state eticlopride-bound (PDB 3PBL, cyan cartoons) and active state pramipexole-bound D<sub>3</sub>R (PDB 7CMU, orange cartoons). Conserved motifs are highlighted with relevant residues displayed as sticks. **B** Overall view of G<sub>0</sub> selected mutations to G<sub>i</sub> equivalent residues (highlighted in violet) (top panel) and concentration-response curves of D<sub>3</sub>R upon G<sub>0A</sub> mutants activation by FOB02-04A using TRUPATH assay (shown as net BRET, bottom panel). Data are derived from three (G<sub>0A</sub> I28<sup>G.HN.52E</sup>, N194<sup>G.s2s3.02D</sup>, Y354<sup>G.H5.26F</sup>) and four (G<sub>0A</sub>-V334<sup>G.H5.06F</sup>, G350<sup>G.H5.22D</sup>) independent experiments performed in technical triplicate. Source data are provided as a Source Data File.

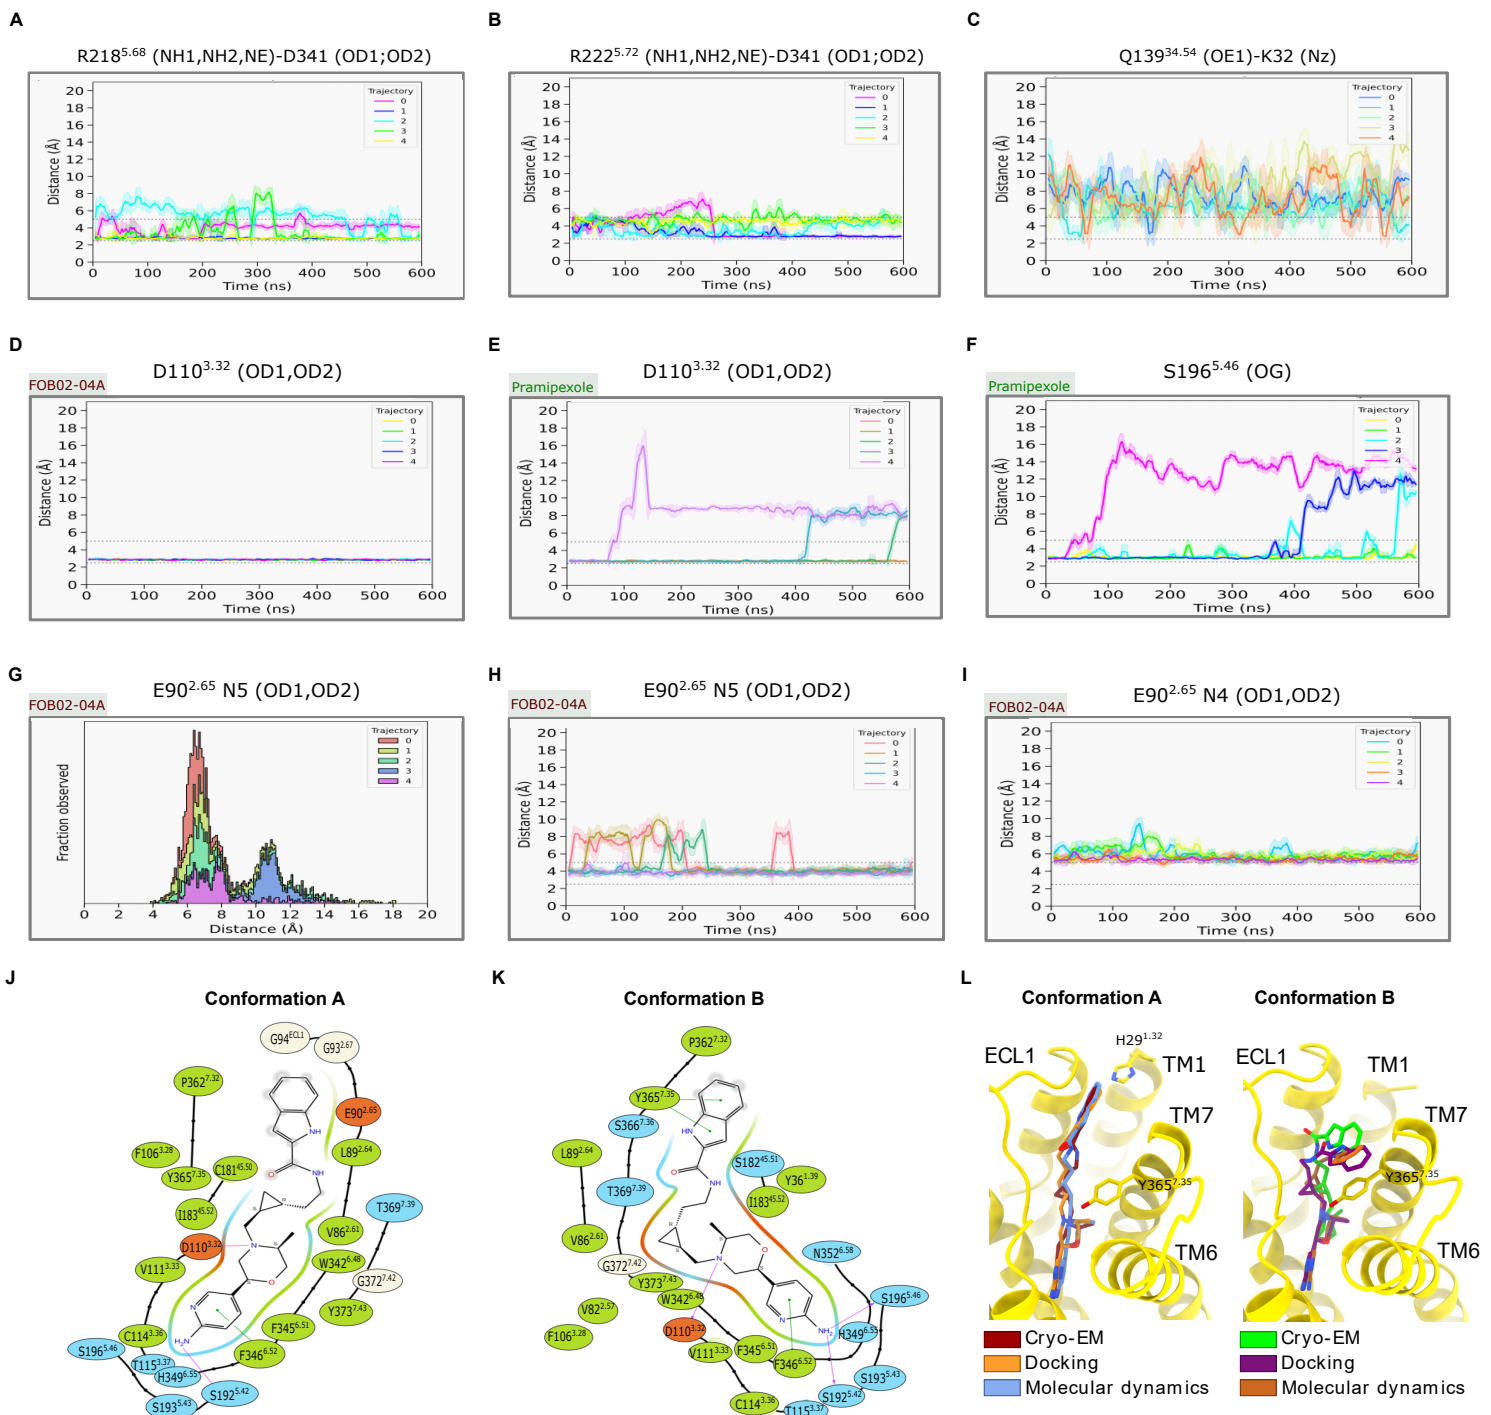

**Supplementary Figure 6. MD simulations of D<sub>3</sub>R:Gα<sub>0</sub>βγ interactions with bitopic FOB02-04A and pramipexole.** **A-B** Salt bridge interaction between negatively charged carboxyl group of polar residue D341<sup>G.H5.13</sup> of Gα<sub>0</sub> C-terminal α5 and positively charged guanidinium group of FOB02-04A: D<sub>3</sub>R polar residue R218<sup>5.68</sup> (**A**) and polar residue R222<sup>5.72</sup> (**B**). **C** Closest distance between Q139<sup>34.54</sup> in D<sub>3</sub>R and terminal tertiary amine moiety of K32<sup>G.hsn1.03</sup> of Gα<sub>0</sub> N-terminal helix. **D-E** Salt bridge interaction between oxygen atoms of carboxyl group of D110<sup>3.32</sup> in D<sub>3</sub>R with the basic nitrogen of trans-cyclopropyl amine linkage of FOB02-04A (**D**) and with the atom N1 of the propylamino group of pramipexole (**E**). **F** Hydrogen bond interaction between oxygen atom S196<sup>5.46</sup> in D<sub>3</sub>R with the atom type bitopic FOB0204-A within the D<sub>3</sub>R:Gα<sub>0</sub>βγ complex. **G** Frequency of interactions indicates the presence of two distinct conformational states of estimated distribution of 90% for Conformation A and 10% for Conformation B. **H-I** Closest distances between oxygen atoms of carboxyl group of E90<sup>2.65</sup> in D<sub>3</sub>R with the atom type N5 of the indole moiety (**H**) and atom N4 of the amide group of FOB02-04A (**I**). Data from five independent simulations of D<sub>3</sub>R:Gα<sub>0</sub>βγ heterotrimer complex are shown, spanning 0.6 μs of cumulative time per system, with the sampling rate of 10 frames per ns, solid lines and same-color bonding interactions are shown at 5.0 Å and 2.5 Å thresholds (grey, dashed lines). **J-K** 2D interaction diagram between D<sub>3</sub>R with D<sub>3</sub>R:Gα<sub>0</sub>βγ and ligands (**J**) bitopic FOB02-04A Conformation A and (**K**) bitopic FOB02-04A Conformation B. Specific residues in the binding pocket that interact are shown as sticks and are labelled. Color code for residues and interactions: green, hydrophobic; blue, polar; red, negatively charged; grey, glycine. The solid purple arrow line shows the H-bonding interaction, solid green line shows the π-π-π stacking interaction. **L** Comparison of FOB02-04A poses obtained from cryo-EM structure with those predicted by molecular docking and molecular dynamic simulations for Conformation A (left panel) and B (right panel).

A

| FOB02-04A<br>D <sub>3</sub> R           | Potencies<br>pEC <sub>50</sub> (M) ± SEM | Δ     | Efficacies<br>(% of WT) ± SEM | Δ      | Expression<br>(% of WT) ± SEM |
|-----------------------------------------|------------------------------------------|-------|-------------------------------|--------|-------------------------------|
| WT                                      | 9.45 ± 0.35                              | 0     | 100 ± 11.25                   | 0      | 100                           |
| L119 <sup>3.41</sup> W                  | 9.15 ± 0.18                              | -0.3  | 108.12 ± 9.50                 | 8.12   | 170.6 ± 11.9                  |
| H29 <sup>1.32</sup> A                   | 8.94 ± 0.45                              | -0.51 | 54.72 ± 12.05                 | -45.28 | 113 ± 2.4                     |
| H29 <sup>1.32</sup> F                   | 9.59 ± 0.05                              | 0.14  | 40.86 ± 5.47                  | -59.14 | 69.9 ± 6.5                    |
| H29 <sup>1.32</sup> K                   | 9.44 ± 0.08                              | -0.01 | 75.82 ± 4.88                  | -24.18 | 88 ± 17.0                     |
| H29 <sup>1.32</sup> R                   | 9.18 ± 0.15                              | -0.27 | 50.4 ± 3.88                   | -49.6  | 82.39 ± 7.3                   |
| V86 <sup>2.61</sup> A                   | 9.99 ± 0.21                              | 0.54  | 65.16 ± 9.29                  | -34.84 | 72.5 ± 1.0                    |
| L89 <sup>2.64</sup> A                   | 8.74 ± 0.27                              | -0.71 | 83.86 ± 14.49                 | -16.14 | 95.3 ± 13.7                   |
| E90 <sup>2.65</sup> A                   | 9.57 ± 0.29                              | 0.12  | 105.67 ± 6.56                 | 5.67   | 154.3 ± 3.1                   |
| ΔG94 <sup>ECL1</sup>                    | ND                                       | ND    | ND                            | ND     | 130 ± 15.5                    |
| F106 <sup>5.28</sup> A                  | 8.57 ± 0.48                              | -0.88 | 50.12 ± 3.81                  | -49.88 | 121.1 ± 7.4                   |
| D110 <sup>3.32</sup> A                  | ND                                       | ND    | ND                            | ND     | 79.7 ± 13.3                   |
| V111 <sup>3.33</sup> A                  | 7.39 ± 0.38                              | -2.06 | 94.72 ± 6.53                  | -5.26  | 63 ± 9.4                      |
| T115 <sup>3.37</sup> A                  | 7.66 ± 0.41                              | -1.79 | 91.19 ± 15.14                 | -8.81  | 88.9 ± 9.9                    |
| I183 <sup>45.52</sup> A                 | 7.17 ± 0.11                              | -2.28 | 100.85 ± 3.84                 | 0.85   | 79.7 ± 5.2                    |
| S192 <sup>5.42</sup> A                  | 10.02 ± 0.33                             | 0.57  | 78.39 ± 14.71                 | -21.61 | 106.2 ± 6.4                   |
| S193 <sup>5.43</sup> A                  | 10.39 ± 0.42                             | 0.94  | 98.15 ± 30.65                 | -1.85  | 207.3 ± 9.1                   |
| S196 <sup>5.46</sup> A                  | 9.24 ± 0.83                              | -0.21 | 63.37 ± 13.13                 | -36.53 | 238.1 ± 17.5                  |
| W342 <sup>6.48</sup> A                  | ND                                       | ND    | ND                            | ND     | 100.9 ± 4.3                   |
| F345 <sup>6.51</sup> A                  | 10.03 ± 0.3                              | 0.58  | 118.44 ± 19.86                | 18.44  | 183 ± 9.9                     |
| F346 <sup>6.52</sup> A                  | 10.00 ± 0.29                             | 0.55  | 69.55 ± 4                     | -30.41 | 126.8 ± 2                     |
| Y365 <sup>7.35</sup> A                  | 9.64 ± 0.49                              | 0.19  | 112.43 ± 10.83                | 12.43  | 105 ± 2.4                     |
| T369 <sup>7.39</sup> A                  | 10.89 ± 0.33                             | 1.44  | 90.11 ± 9.42                  | -9.89  | 125.5 ± 0.8                   |
| Y373 <sup>7.43</sup> A                  | ND                                       | ND    | ND                            | ND     | 110 ± 8.0                     |
| D <sub>2</sub> R                        | 7.48 ± 0.21                              | -1.97 | 110.96 ± 6.43                 | 10.96  | 215.3 ± 18                    |
| D <sub>2</sub> R Y408 <sup>7.35</sup> A | 8.11 ± 0.39                              | -1.34 | 131.8 ± 7.06                  | 31.8   | 155.6 ± 17.3                  |

B

| FOB02-04A<br>D <sub>3</sub> R-G <sub>o</sub> mutants | Potencies<br>pEC <sub>50</sub> (M) ± SEM | Δ     | Efficacies<br>(% of WT) ± SEM | Δ     |
|------------------------------------------------------|------------------------------------------|-------|-------------------------------|-------|
| I28 <sup>G.HN.52</sup> E                             | 9.06 ± 0.39                              | -0.39 | 161.65 ± 10.7                 | 61.65 |
| N194 <sup>G.s2s3.02</sup> D                          | 8.69 ± 0.15                              | -0.76 | 169.18 ± 13.07                | 69.18 |
| V334 <sup>G.H5.06</sup> F                            | 8.84 ± 0.09                              | -0.61 | 130.8 ± 5.01                  | 30.8  |
| G350 <sup>G.H5.22</sup> D                            | 8.43 ± 0.09                              | -1.02 | 158.0 ± 4.31                  | 58    |
| Y354 <sup>G.H5.26</sup> F                            | 8.90 ± 0.35                              | -0.55 | 144.5 ± 9.87                  | 44.5  |
| G <sub>o</sub> WT                                    | 8.17 ± 0.59                              | -1.28 | 98.9 ± 14.83                  | -1.1  |

C

| Pramipexole<br>D <sub>3</sub> R | Potencies<br>pEC <sub>50</sub> (M) ± SEM | Δ    | Efficacies<br>(% of WT) ± SEM | Δ     |
|---------------------------------|------------------------------------------|------|-------------------------------|-------|
| WT                              | 9.32 ± 0.5                               | 0    | 95.40 ± 27                    | -4.6  |
| H29 <sup>1.32</sup> A           | 9.93 ± 0.56                              | 0.61 | 54.5 ± 17.9                   | -40.9 |
| H29 <sup>1.32</sup> F           | 9.21 ± 0.21                              | 0.11 | 89.49 ± 14.25                 | 5.91  |

| Quinpirole<br>D <sub>3</sub> R | Potencies<br>pEC <sub>50</sub> (M) ± SEM | Δ      | Efficacies<br>(% of WT) ± SEM | Δ      |
|--------------------------------|------------------------------------------|--------|-------------------------------|--------|
| WT                             | 8.90 ± 0.049                             | 0      | 97.48 ± 2.28                  | 0      |
| H29 <sup>1.32</sup> A          | 8.28 ± 0.36                              | -0.615 | 72.6 ± 12.0                   | -24.88 |
| ΔG94 <sup>ECL1</sup>           | 9.79 ± 0.60                              | 0.89   | 82.24 ± 23                    | -15.24 |

D

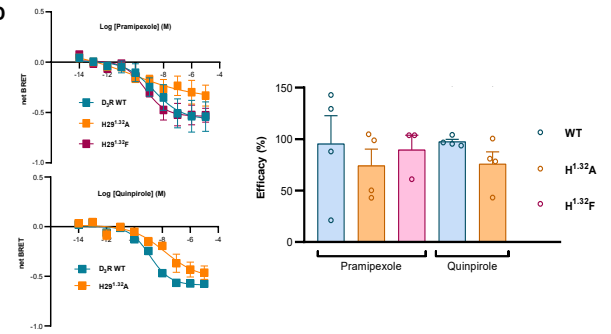

E

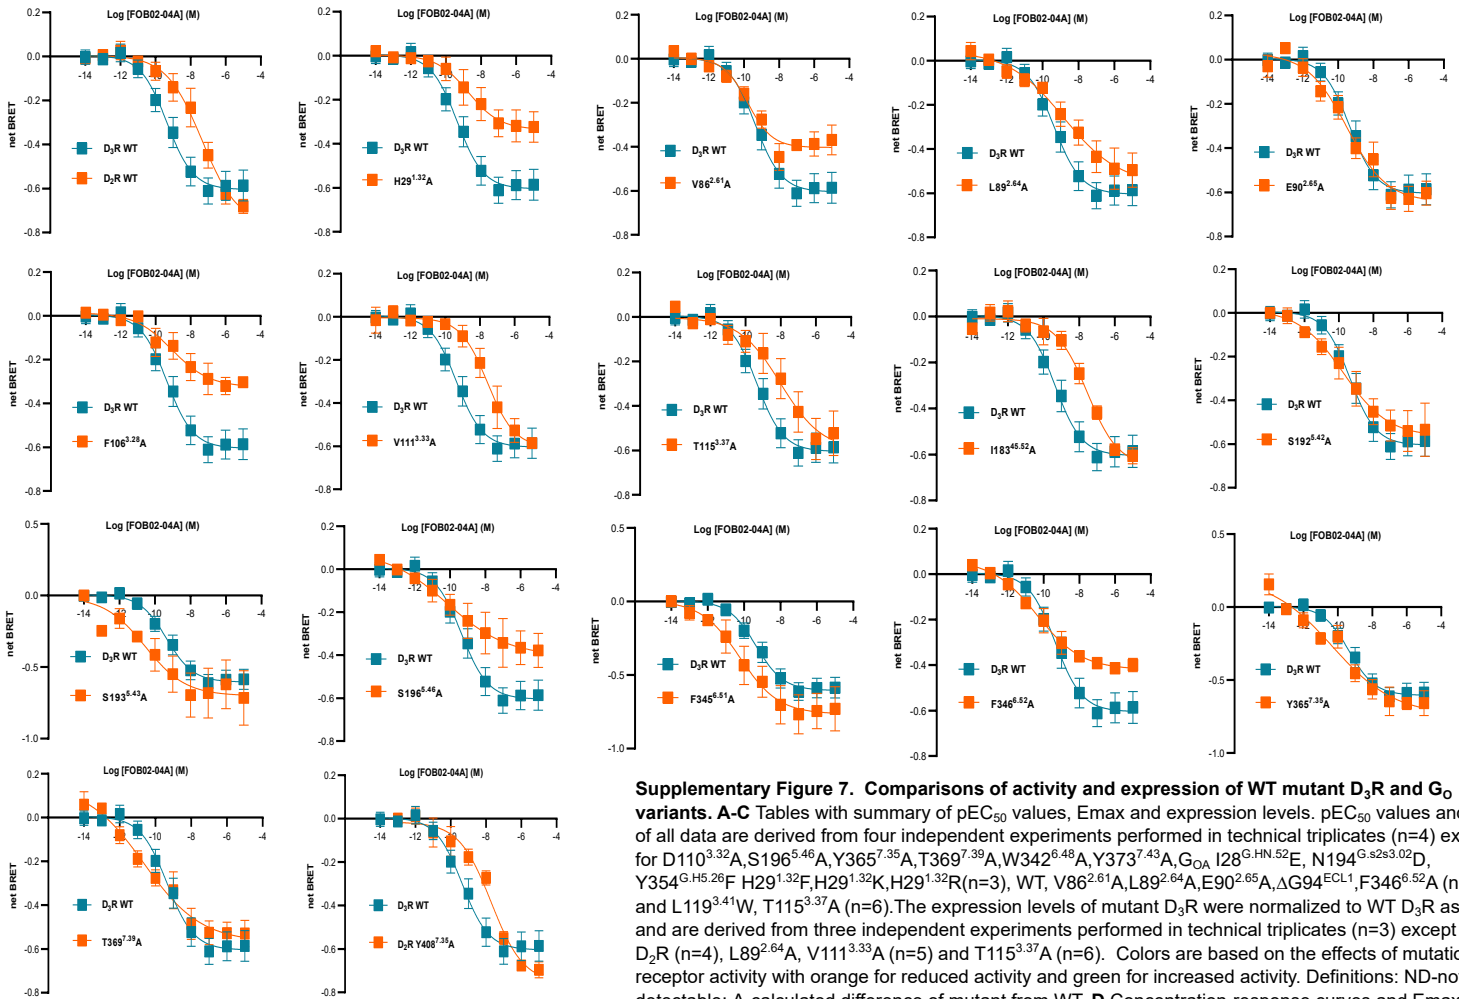

**Supplementary Figure 7. Comparisons of activity and expression of WT mutant D<sub>3</sub>R and G<sub>o</sub> variants.** A-C Tables with summary of pEC<sub>50</sub> values, Emax and expression levels. pEC<sub>50</sub> values and Emax of all data are derived from four independent experiments performed in technical triplicates (n=4) except for D110<sup>3.32</sup>A, S196<sup>5.46</sup>A, Y365<sup>7.35</sup>A, T369<sup>7.39</sup>A, W342<sup>6.48</sup>A, Y373<sup>7.43</sup>A, G<sub>oA</sub> I28<sup>G.HN.52</sup>E, N194<sup>G.s2s3.02</sup>D, Y354<sup>G.H5.26</sup>F, H29<sup>1.32</sup>F, H29<sup>1.32</sup>K, H29<sup>1.32</sup>R (n=3), WT, V86<sup>2.61</sup>A, L89<sup>2.64</sup>A, E90<sup>2.65</sup>A, ΔG94<sup>ECL1</sup>, F346<sup>6.52</sup>A (n=5) and L119<sup>3.41</sup>W, T115<sup>3.37</sup>A (n=6). The expression levels of mutant D<sub>3</sub>R were normalized to WT D<sub>3</sub>R as 100% and are derived from three independent experiments performed in technical triplicates (n=3) except for D<sub>2</sub>R (n=4), L89<sup>2.64</sup>A, V111<sup>3.33</sup>A (n=5) and T115<sup>3.37</sup>A (n=6). Colors are based on the effects of mutations on receptor activity with orange for reduced activity and green for increased activity. Definitions: ND-not detectable; Δ-calculated difference of mutant from WT. D Concentration-response curves and Emax values for H29<sup>1.32</sup> mutants upon activation of G<sub>oA</sub> using TRUPATH assays in the presence of pramipexole or quinpirole. Emax values have been normalized to D<sub>3</sub>R WT activity in the presence of FOB02-04A and are derived from four independent experiments performed in technical triplicates (n=4) except for H29<sup>1.32</sup>F (n=3) (Holm-Sidak multiple comparisons tests two tailed p value). E Concentration-response curves for WT (blue) and mutant D<sub>3</sub>R (orange) following FOB02-04A G<sub>oA</sub> activation obtained using the TRUPATH assay (shown as net BRET). Data are presented as means ± SEM derived from four independent experiments performed in technical triplicates (n=4) except for S196<sup>5.46</sup>A, Y365<sup>7.35</sup>A, T369<sup>7.39</sup>A (n=3), WT, V86<sup>2.61</sup>A, L89<sup>2.64</sup>A, E90<sup>2.65</sup>A, F346<sup>6.52</sup>A (n=5) and T115<sup>3.37</sup>A (n=6). All functional source data are provided as a source data file.



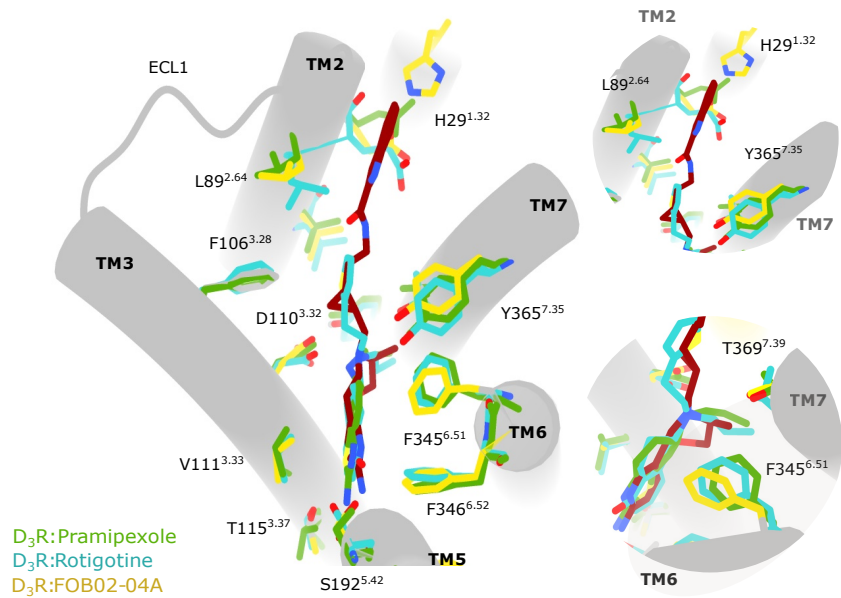

**Supplementary Figure 8. Comparisons of FOB02-04A, pramipexole and rotigotine binding site on the D<sub>3</sub>R.** FOB02-04A, pramipexole and rotigotine are depicted as red, green and cyan sticks. D<sub>3</sub>R is shown as grey cartoons with relevant residues as sticks with carbon colour corresponding to the agonist (red, green and cyan for FOB02-04A, pramipexole and rotigotine respectively).

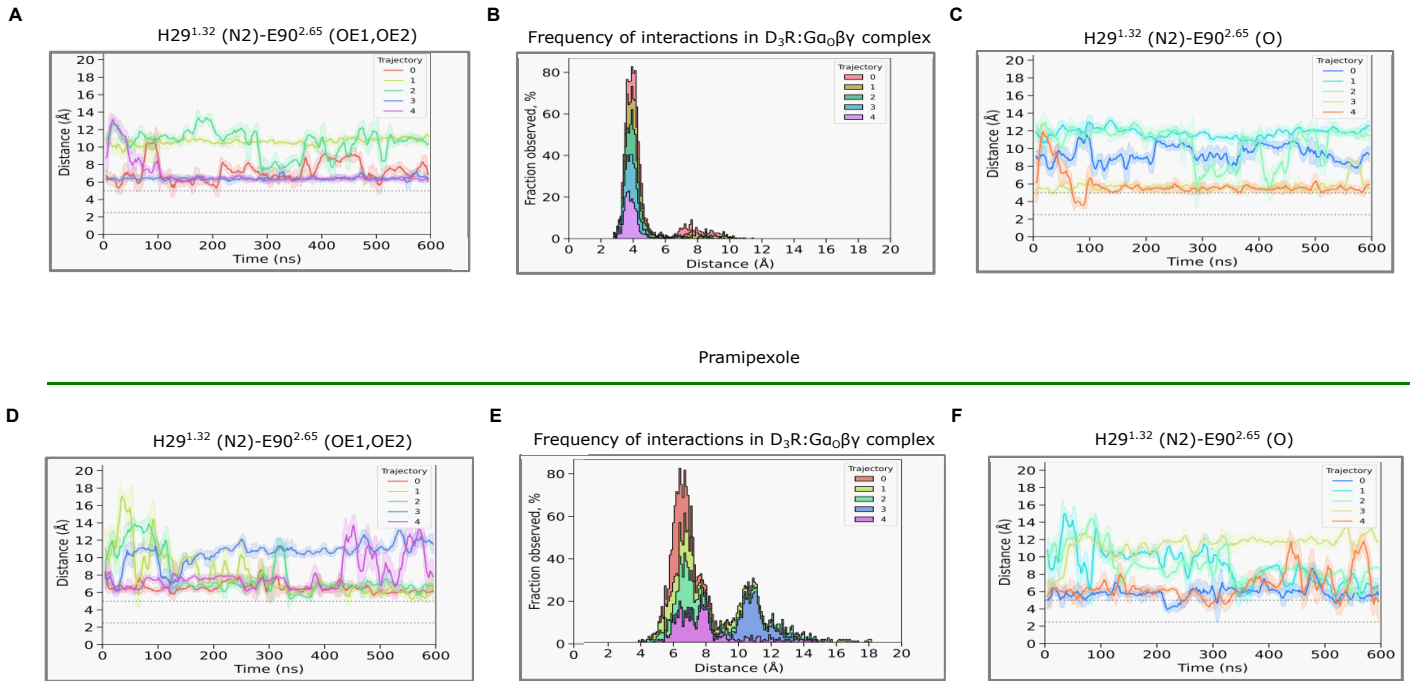

**Supplementary Figure 9. MD analysis of TM1 stability in interactions of D<sub>3</sub>R:Gα<sub>0</sub>βγ with bitopic FOB02-04A (A-C) and pramipexole (D-F).** **A** Closest distances between the carboxyl group of E90<sup>2.65</sup> and the protonated N(ε) of H29<sup>1.32</sup> with FOB02-04A. **B** Frequency of interactions between the same groups in the presence of FOB02-04A. **C** Closest distances between backbone oxygen atom of E90<sup>2.65</sup> and the protonated N(ε) of H29<sup>1.32</sup> with FOB02-04A. **D** Closest distances between the carboxyl group of E90<sup>2.65</sup> and the protonated N(ε) of H29<sup>1.32</sup> with pramipexole (PDB 7CMU). **E** Frequency of interactions between the same groups in the presence of pramipexole (PDB 7CMU). **F** Closest distances between backbone oxygen atom of E90<sup>2.65</sup> and the protonated N(ε) of H29<sup>1.32</sup> with pramipexole (PDB 7CMU). Five independent simulations of D<sub>3</sub>R-Gα<sub>0</sub>βγ heterotrimer complex are shown, spanning 0.6 μs of cumulative time per system, with the sampling rate of 10 frames per ns, solid lines and same-color shadows representing moving average values and one standard deviation respectively from 50 frames in all cases. Upper and lower boundaries for hydrogen bonding interactions are shown at 5.0 Å and 2.5 Å thresholds (grey, dashed lines).

**Supplementary Table 1.** Cryo-EM data collection, refinement and validation statistics.

|                                                  | D <sub>3</sub> R:Gα <sub>0</sub> βγ:FOB02-04A<br>Conformation A | D <sub>3</sub> R:Gα <sub>0</sub> βγ:FOB02-04A<br>Conformation B |
|--------------------------------------------------|-----------------------------------------------------------------|-----------------------------------------------------------------|
| <b>Data collection and processing</b>            |                                                                 |                                                                 |
| Microscope                                       | FEI Titan Krios                                                 | FEI Titan Krios                                                 |
| ESRF data identification                         | 10.15151/ESRF-ES-751565769                                      | 10.15151/ESRF-ES-751565769                                      |
| Detector                                         | K3 + GIF                                                        | K3 + GIF                                                        |
| Magnification                                    | 105,000x                                                        | 105,000x                                                        |
| Voltage (kV)                                     | 300                                                             | 300                                                             |
| Electron exposure (e-/Å <sup>2</sup> )           | 49.88662                                                        | 49.88662                                                        |
| Defocus range (μm)                               | -1 to -3                                                        | -1 to -3                                                        |
| Pixel size (Å)                                   | 0.84                                                            | 0.84                                                            |
| Symmetry imposed                                 | C1                                                              | C1                                                              |
| Micrographs                                      | 22,655                                                          | 22,655                                                          |
| Final particle images (no.)                      | 275,383                                                         | 159,184                                                         |
| Map resolution (Å)                               | 3.05                                                            | 3.09                                                            |
| FSC threshold                                    | 0.143                                                           | 0.143                                                           |
| <b>Refinement</b>                                |                                                                 |                                                                 |
| Initial model used (PDB code)                    | 7CMV, 6K41                                                      | 7CMV, 6K41                                                      |
| Model resolution <sup>1</sup> (Å)                | 3.1                                                             | 3.4                                                             |
| FSC threshold                                    | 0.5                                                             | 0.5                                                             |
| Map sharpening <i>B</i> factor (Å <sup>2</sup> ) | -100                                                            | -156.9                                                          |
| Model composition                                |                                                                 |                                                                 |
| Non-hydrogen atoms                               | 8,666                                                           | 8,633                                                           |
| Protein residues                                 | 1,115                                                           | 1,112                                                           |
| Ligands                                          |                                                                 |                                                                 |
| <i>B</i> factors (Å <sup>2</sup> )               |                                                                 |                                                                 |
| Protein                                          | 78.52                                                           | 118.04                                                          |
| Ligand                                           | 48.81                                                           | 106.34                                                          |
| R.m.s. deviations                                |                                                                 |                                                                 |
| Bond lengths (Å)                                 | 0.003                                                           | 0.01                                                            |
| Bond angles (°)                                  | 0.51                                                            | 1.06                                                            |
| Validation                                       |                                                                 |                                                                 |
| MolProbity score                                 | 1.33                                                            | 1.30                                                            |
| Clashscore                                       | 4.89                                                            | 5.61                                                            |
| Poor rotamers (%)                                | 0.21                                                            | 0.53                                                            |
| EMRinger score                                   | 3.22                                                            | 2.67                                                            |
| Ramachandran plot                                |                                                                 |                                                                 |
| Favored (%)                                      | 95.44                                                           | 98.35                                                           |
| Allowed (%)                                      | 4.47                                                            | 1.55                                                            |
| Disallowed (%)                                   | 0.09                                                            | 0.09                                                            |
| PDB/EMDB codes                                   | 9F33/50168                                                      | 9F34/50169                                                      |

<sup>1</sup>Resolution at which FSC between map and model is 0.5

**Supplementary Table 2.** Molecular Dynamics Summary Table

| Reliability and reproducibility checklist for molecular dynamics simulations<br>*All boxes must be marked YES by acceptance unless an N/A option is available                                                                                                                                                          |                                                                                              | Yes                                 | N/A                                 | Response<br>(Please state where this information can be found in the text)                                                                                             |
|------------------------------------------------------------------------------------------------------------------------------------------------------------------------------------------------------------------------------------------------------------------------------------------------------------------------|----------------------------------------------------------------------------------------------|-------------------------------------|-------------------------------------|------------------------------------------------------------------------------------------------------------------------------------------------------------------------|
| <b>1. Convergence of simulations and analysis</b>                                                                                                                                                                                                                                                                      |                                                                                              |                                     |                                     |                                                                                                                                                                        |
| 1a. Is an evaluation presented in the text to show that the property being measured has equilibrated in the simulations (e.g. time-course analysis)?                                                                                                                                                                   |                                                                                              | <input checked="" type="checkbox"/> |                                     | The information can be found in the Molecular Dynamics Simulations section within Methods                                                                              |
| 1b. Then, is it described in the text how simulations are split into equilibration and production runs and how much data were analyzed from production runs?                                                                                                                                                           |                                                                                              | <input checked="" type="checkbox"/> |                                     | The information can be found in the Molecular Dynamics Simulations section within Methods                                                                              |
| 1c. Are there at least 3 simulations per simulation condition with statistical analysis?                                                                                                                                                                                                                               |                                                                                              | <input checked="" type="checkbox"/> |                                     | The information can be found in Supplementary Information, Fig.6 as well Activation mechanism and GO coupling of the D3R bound to FOB02-04A section of the manuscript. |
| 1d. Is evidence provided in the text that the simulation results presented are independent of initial configuration?                                                                                                                                                                                                   |                                                                                              | <input checked="" type="checkbox"/> |                                     | The information can be found in the Molecular Dynamics Simulations section of the Methods section of the manuscript                                                    |
| <b>2. Connection to experiments</b>                                                                                                                                                                                                                                                                                    |                                                                                              |                                     |                                     |                                                                                                                                                                        |
| 2a. Are calculations provided that can connect to experiments (e.g. loss or gain in function from mutagenesis, binding assays, NMR chemical shifts, J-couplings, SAXS curves, interaction distances or FRET distances, structure factors, diffusion coefficients, bulk modulus and other mechanical properties, etc.)? |                                                                                              | <input checked="" type="checkbox"/> |                                     | The MD results are thoroughly connected to Cryo-EM structural information as well as mutational and functional results.                                                |
| <b>3. Method choice</b>                                                                                                                                                                                                                                                                                                |                                                                                              |                                     |                                     |                                                                                                                                                                        |
| 3a. Is it described in the text what force field and water model are used and why?                                                                                                                                                                                                                                     |                                                                                              | <input checked="" type="checkbox"/> |                                     | The information can be found in the Molecular Dynamics Simulations section of the Methods section of the manuscript                                                    |
| 3b. Do simulations contain membranes, membrane proteins, intrinsically disordered proteins, glycans, nucleic acids, polymers, or cryptic ligand binding?                                                                                                                                                               |                                                                                              | <input checked="" type="checkbox"/> | <input type="checkbox"/>            | The information can be found in the Molecular Dynamics Simulations section of the Methods section of the manuscript                                                    |
|                                                                                                                                                                                                                                                                                                                        | If 3b is YES, are enhanced sampling methods used?                                            | <input type="checkbox"/>            | <input checked="" type="checkbox"/> | Response not needed if N/A                                                                                                                                             |
|                                                                                                                                                                                                                                                                                                                        | If enhanced sampling methods are used, are the convergence criteria clearly stated?          | <input type="checkbox"/>            |                                     |                                                                                                                                                                        |
|                                                                                                                                                                                                                                                                                                                        | If 3b is YES, is it explained in the text why or why not enhanced sampling methods are used? | <input checked="" type="checkbox"/> |                                     | We have added the following to the Molecular                                                                                                                           |

|                                                                                                                                                                                                                       |                                     |                                     |  |                                                                                                                                                                                                                                                                                                                                                                    |
|-----------------------------------------------------------------------------------------------------------------------------------------------------------------------------------------------------------------------|-------------------------------------|-------------------------------------|--|--------------------------------------------------------------------------------------------------------------------------------------------------------------------------------------------------------------------------------------------------------------------------------------------------------------------------------------------------------------------|
|                                                                                                                                                                                                                       |                                     |                                     |  | <p>Dynamics Simulations section of the Methods:<br/> <i>Since the structural insights into the binding mode of the D<sub>3</sub> receptor bound to a bitopic agonist were efficiently achieved using standard MD simulations, without the need to explore rare events or surmount significant energy barriers, no enhanced sampling methods were required.</i></p> |
| <b>4. Code and reproducibility</b>                                                                                                                                                                                    |                                     |                                     |  |                                                                                                                                                                                                                                                                                                                                                                    |
| 4a. Is a table provided describing the system setup, such as simulation box dimensions, total number of atoms, total number of water molecules, salt concentration, lipid composition (number of molecules and type)? | <input checked="" type="checkbox"/> |                                     |  | The information can be found in the Molecular Dynamics Simulations section of the Methods section. An additional Supplementary table has been added to describe the system composition.                                                                                                                                                                            |
| 4b. Is it described in the text what simulation and analysis software and which versions are used?                                                                                                                    | <input checked="" type="checkbox"/> |                                     |  | The information can be found in the Molecular Dynamics Simulations section of the Methods section of the manuscript                                                                                                                                                                                                                                                |
| 4c. Are initial coordinate and simulation input files and a coordinate file of the final output provided as supplementary files or in a public repository?                                                            | <input checked="" type="checkbox"/> |                                     |  | The information can be found in the Data availability section of the manuscript. The trajectories for the Molecular Dynamics simulations have been deposited as an open-access Zenodo repository.                                                                                                                                                                  |
| 4d. Is there custom code or custom force field parameters?                                                                                                                                                            | <input type="checkbox"/>            | <input checked="" type="checkbox"/> |  | Response not needed if<br>N/A                                                                                                                                                                                                                                                                                                                                      |
| If <b>YES</b> , are they provided as supplementary profiles or in a public repository?                                                                                                                                | <input type="checkbox"/>            |                                     |  |                                                                                                                                                                                                                                                                                                                                                                    |

**Supplementary Table 3.** Number of atoms in the assembled system for Molecular Dynamics simulations.

| <b>Composition</b>            | <b>D<sub>3</sub>R:Gαβγ:FOB02-04A (molecules/atoms)</b> | <b>D<sub>3</sub>R:Gαβγ:Pramipexol (molecules/atoms)</b> |
|-------------------------------|--------------------------------------------------------|---------------------------------------------------------|
| <b>D<sub>3</sub> receptor</b> | 1/4427                                                 | 1/4427                                                  |
| <b>FOB02-04A</b>              | 1/64                                                   | 1/33                                                    |
| <b>Gα<sub>o</sub> protein</b> | 1/5545                                                 | 1/5545                                                  |
| <b>Gβ protein</b>             | 1/5094                                                 | 1/5094                                                  |
| <b>Gγ protein</b>             | 1/889                                                  | 1/911                                                   |
| <b>Cholesterol (CHL1)</b>     | 120/8880                                               | 120/8880                                                |
| <b>DPPC</b>                   | 220/28600                                              | 220/28600                                               |
| <b>DOPC</b>                   | 60/8280                                                | 60/8280                                                 |
| <b>Sodium</b>                 | 112                                                    | 108                                                     |
| <b>Chloride</b>               | 104                                                    | 102                                                     |
| <b>Water</b>                  | 38818/115722                                           | 37934/113802                                            |
