# Supplementary material for: A bitopic agonist bound to the dopamine 3 receptor reveals a selectivity site
Source: PubMed Central journal article supplement (PMC11377762; doi:10.1038/s41467-024-51993-4), 2024-09-05
Supplement: 41467_2024_51993_MOESM3_ESM.pdf [file 41467_2024_51993_MOESM3_ESM.pdf]

File name: Supplementary Data 1

Description: Sequences of oligos used in molecular cloning during this work.

| Oligo name            | Sequence                          |
|-----------------------|-----------------------------------|
| <b>Go/i mutations</b> |                                   |
| Go_i_I28E_Fw          | aggatggcgagagcgccgccaagac         |
| Go_i_I28E_Rv          | gcggcgctctcgccatcctctttgaggtttt   |
| Go_i_N194D_Fw         | cattcaaggatctccacttcaggctgtttgac  |
| Go_i_N194D_Rv         | gaagtgagatccttgaatgtgaagtgggtt    |
| Go_i_V334F_Fw         | acatccagtttgttgcagcggctcac        |
| Go_i_V334F_Rv         | tcgaacacaaaactggatgtattcgtgtctgtg |
| Go_I_G350D_Fw         | acctccgggattgcggtgtactgat         |
| Go_i_G350D_Rv         | aagccgcaatcccggaggttgtggc         |
| Go_i_Y354F_Fw         | gcggttgtttgatagctcgagtctagag      |
| Go_i_Y354F_Rv         | agctatcaaaacaagccgagccccg         |

| <b>D3R alanine mutations</b> |                                             |
|------------------------------|---------------------------------------------|
| D3_V86A_Fw                   | cttggtgatgccctgggccgtatacctggaggtgacagg     |
| D3_L89A_Fw                   | cttggtgatgccctgggtgtatacggcagggtgac         |
| D3_E90A_Fw                   | cttggtgatgccctgggtgtatacctggcggtagacagg     |
| D3_Rv_85_94                  | cccagggcatcaccaaggtggccaccagc               |
| D3_S192A_Fw                  | caaccctgattttgcatctacgcctcagtggtgtc         |
| D3_S193A_Fw                  | caaccctgattttgcatctactctgccgtgggtgtc        |
| D3_S196A_Fw                  | caaccctgattttgcatctactctcagtggtggccttctacct |
| D3_Rv_192_196                | gtagatgacaaaaatcagggttgagatggagcag          |
| D3_F106A_Fw                  | gccgcatttgctgtgatgttggcgtcacctgg            |
| D3_D110A_Fw                  | gccgcatttgctgtgatgtttgtcaccctggccgtcatga    |
| D3_V111A_Fw                  | gccgcatttgctgtgatgtttgtcaccctggatgccatgatg  |
| D3_Rv_106_111                | aacatcacagcaaatgaggctgaaattc                |
| D3_S182A_Fw                  | ggggacccactgtctgcgccatctcc                  |
| D3_I183A_Fw                  | ggggacccactgtctgctccgcctccaacc              |
| D3_Rv_182_183                | gacagtggggtcccctgtggtattaaag                |
| D3_F345A_Fw                  | tgtctgctggctgccgccttctgacct                 |
| D3_F346A_Fw                  | tgtctgctggctgcccttgcctgacct                 |
| D3_Rv_345_346                | gggcagccagcagacaatg                         |
| D3_T368A_Fw                  | ccagagctttacagtgccgccacatggctgg             |
| D3_W369A_Fw                  | ccagagctttacagtgccacgacagccctgggctacgtg     |
| D3_Rv_368_372                | ggcactgtaaagctctggggacacgtggcatg            |
| D3_P362A_Fw                  | cagacatgccacgtgtccgccgagctttacag            |
| D3_Y365A_Fw                  | cagacatgccacgtgtccccagagcttggcagtgccac      |
| D3_Rv_362_365                | ggacacgtggcatgtctggcagtg                    |
| D3_deltaG94_Fw               | gtatacctggaggtgacaggtgtctggaattcagccgc      |
| D3_deltaG94_Rv               | acctgtcacctccaggtataccac                    |
| D3_H29A_Fw                   | cagccaggcccggccagccgcctactatgcctctcctac     |
| D3_H29_Rv                    | ggctgggcccggcctggctggcacc                   |
| D3_Y373A_Fw                  | ccagagctttacagtgccacgacatggctgggcccgtgaatag |
| D3_Rv_368_373                | ggcactgtaaagctctggggacacgtggcatg            |
| D3_T115A_Rv                  | tgacatccaggggtgacaaaaacatcacagcaaatgaggct   |

D3\_T115A\_Fw

ttttgtcacctggatgtcatgatgtgtgccgccagcat

|                                                             |                                          |
|-------------------------------------------------------------|------------------------------------------|
| D3_W342A_Fw                                                 | tgtgcttggggccttcattgtctgcgccctgcccttcttc |
| D3_W342A_Rv                                                 | atgaaggccccaagcacaatggccaccatttg         |
| <b>D<sub>2</sub>R alanine mutants</b>                       |                                          |
| D2_Y408A_Fw                                                 | gtgattgcaacattccaccagtgctcgccagcgctttac  |
| D2_Y408A_Rv                                                 | ctggtggaatgttgcaatcacaatgaatgttcaggatgtg |
| <b>Additional D<sub>3</sub>R H29<sup>1.32</sup> mutants</b> |                                          |
| H29R_Fw                                                     | cagccaggcccgcccaagagcctactatgccctctctac  |
| H29F_Fw                                                     | cagccaggcccgccattcgctactatgccctctctac    |
| H29K_Fw                                                     | cagccaggcccgcccaaggcctactatgccctctctac   |
| H29_Rv                                                      | tgggcgggcctggctggcacctgtgga              |
